# Supplementary figures and images for: Pinpointing the tumor-specific T cells via TCR clusters
Source: eLife journal article supplement (doi:10.7554/elife.77274), 2022-04-04

**a**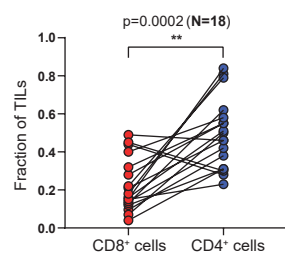**b**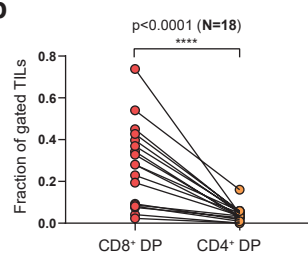**c**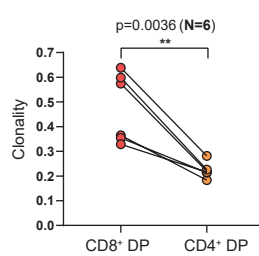**d**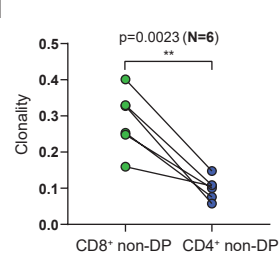

Supplement: supp [file elife-77274-supp-v2.zip]

**a**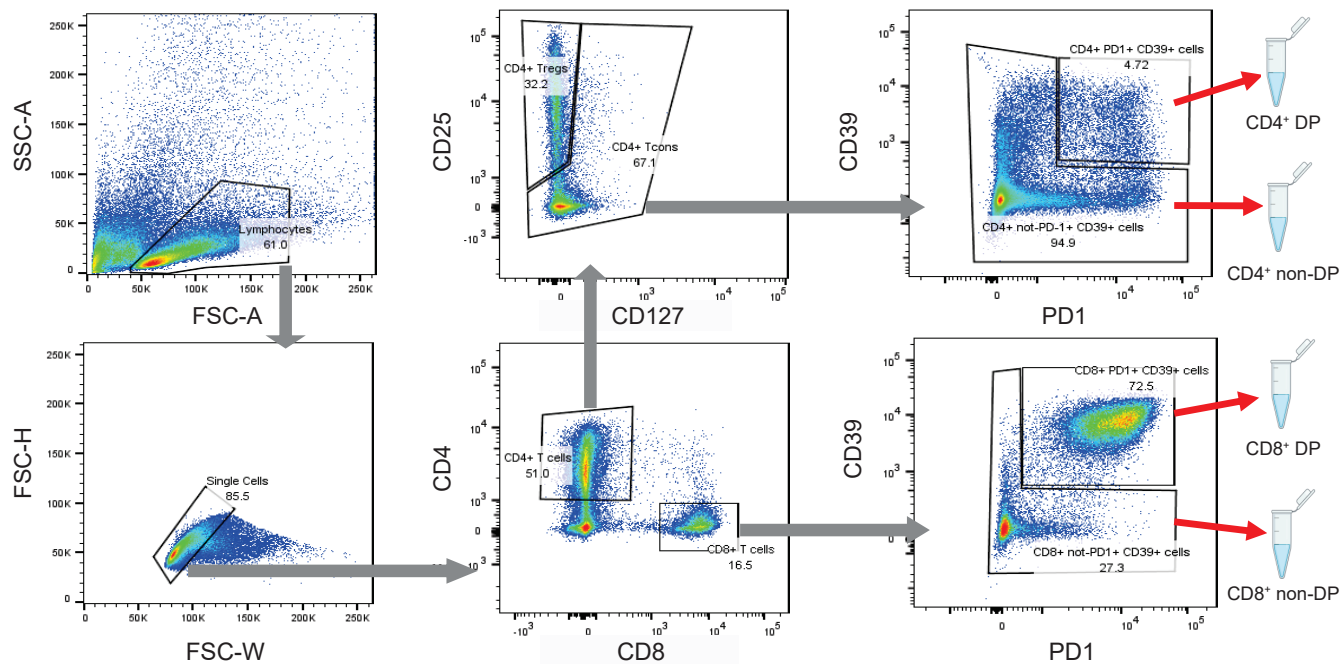**b**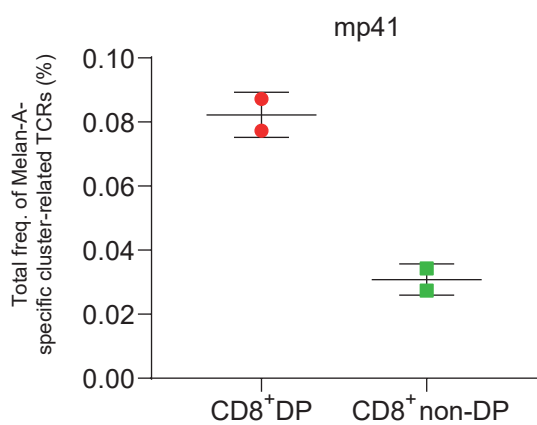**c**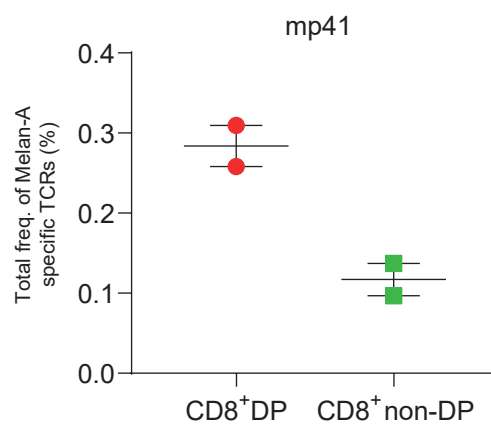**d**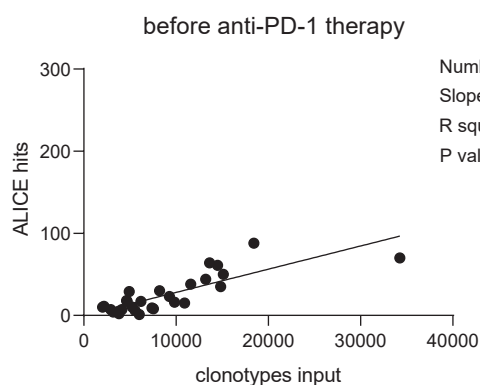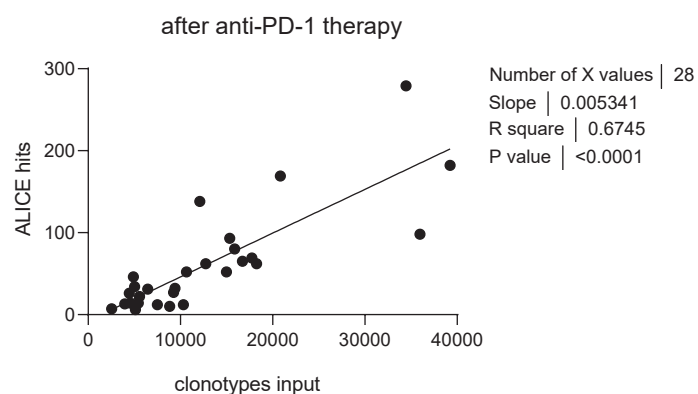

Supplement: supp [file elife-77274-supp-v2.zip]

**a**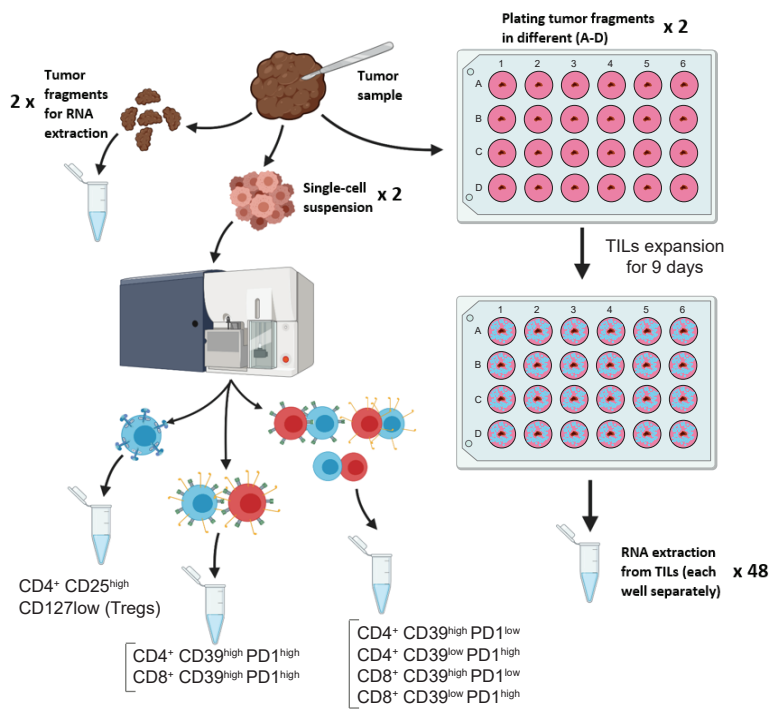**b**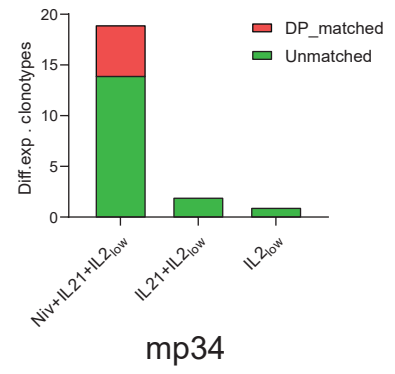**c**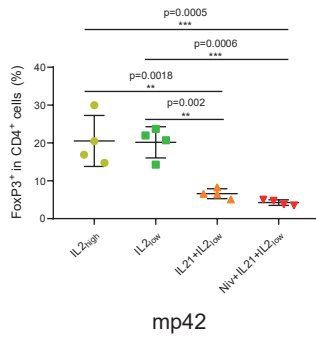**d**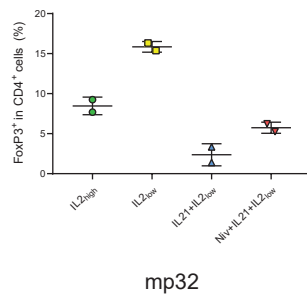**e**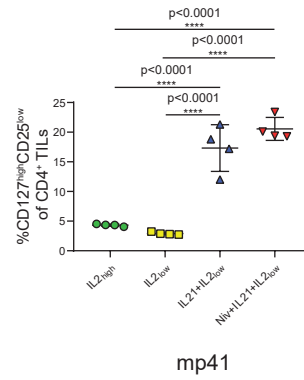**f**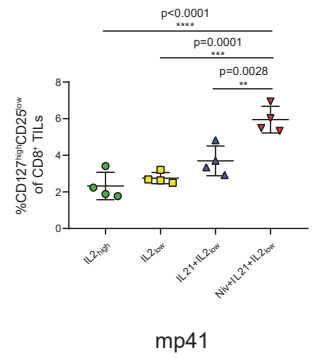

Supplement: supp [file elife-77274-supp-v2.zip]
